# Supplementary material for: Dialects of the DNA Uptake Sequence in Neisseriaceae
Source: PubMed Central journal article supplement (PMC3630211; doi:10.1371/journal.pgen.1003458), 2013-04-18
Supplement: pgen.1003458.s001.pdf [file pgen.1003458.s001.pdf]

A

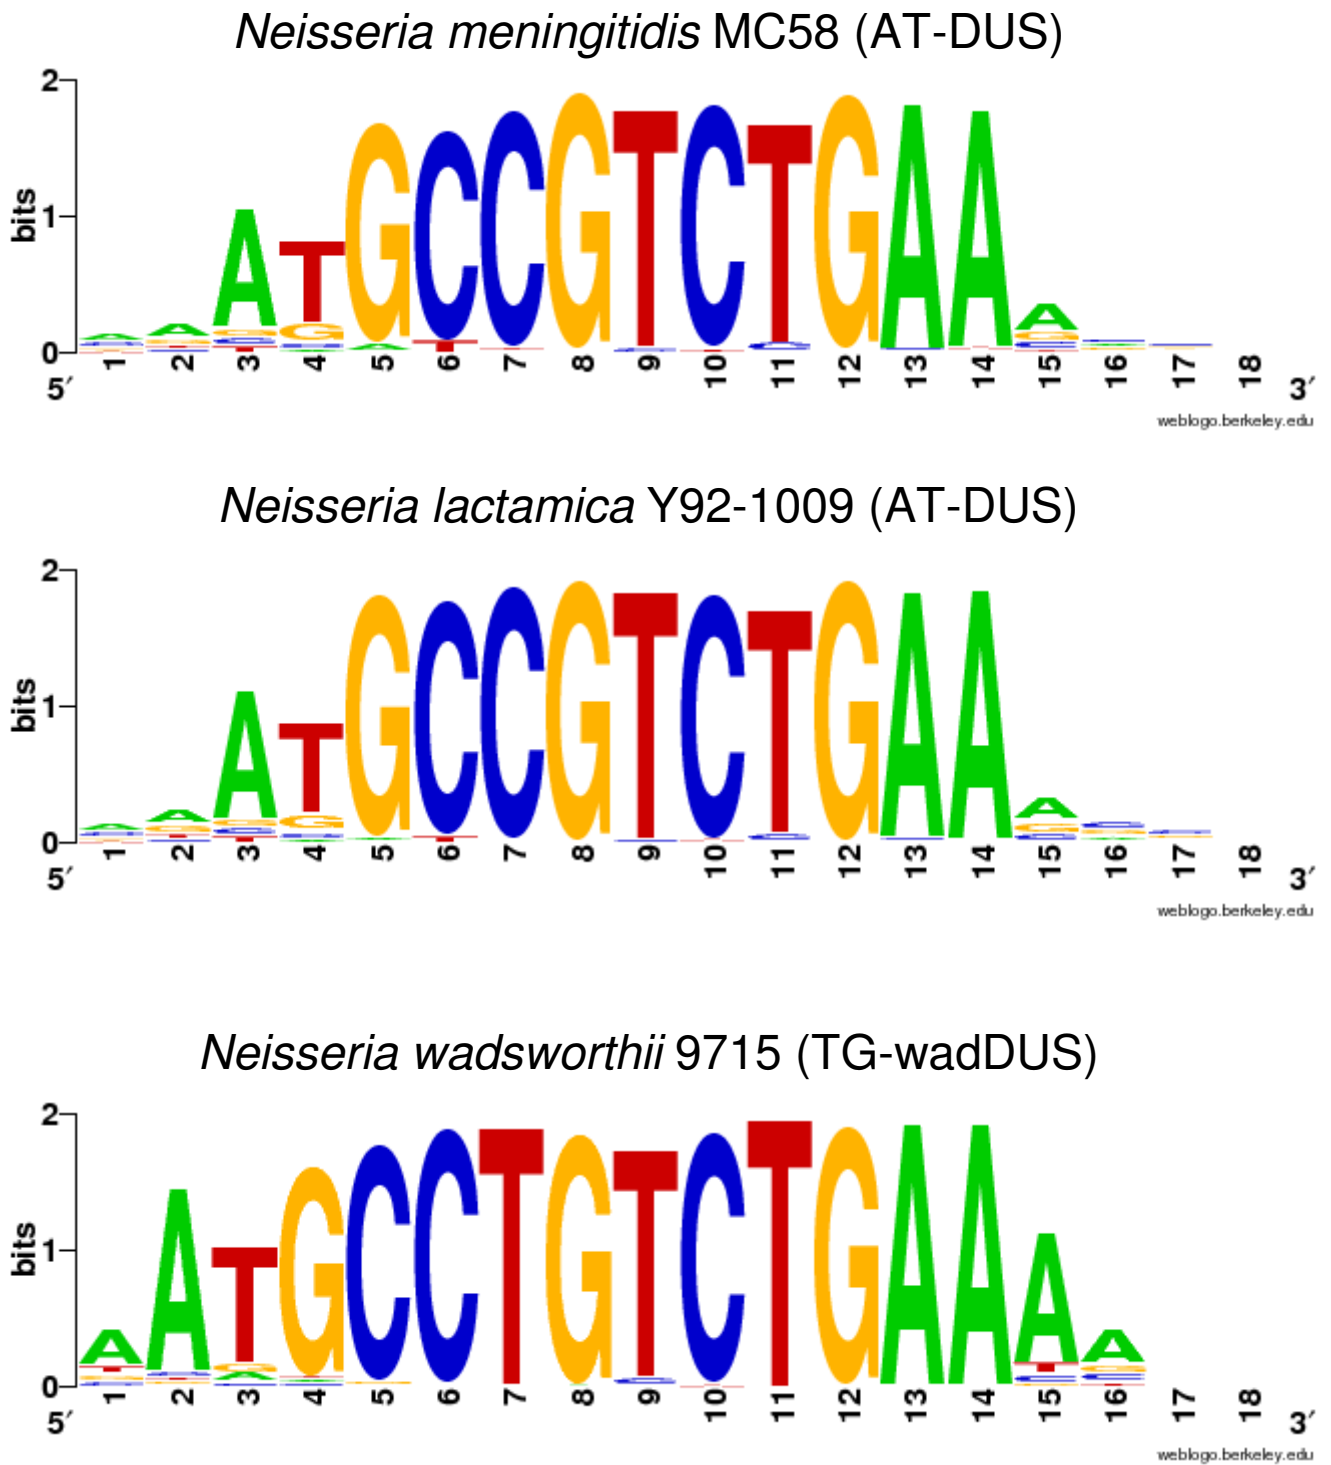

Figure S1: Sequence logos, single divergence permitted

B

*Neisseria bacilliformis* ATCC BAA-1200 (AG-DUS)

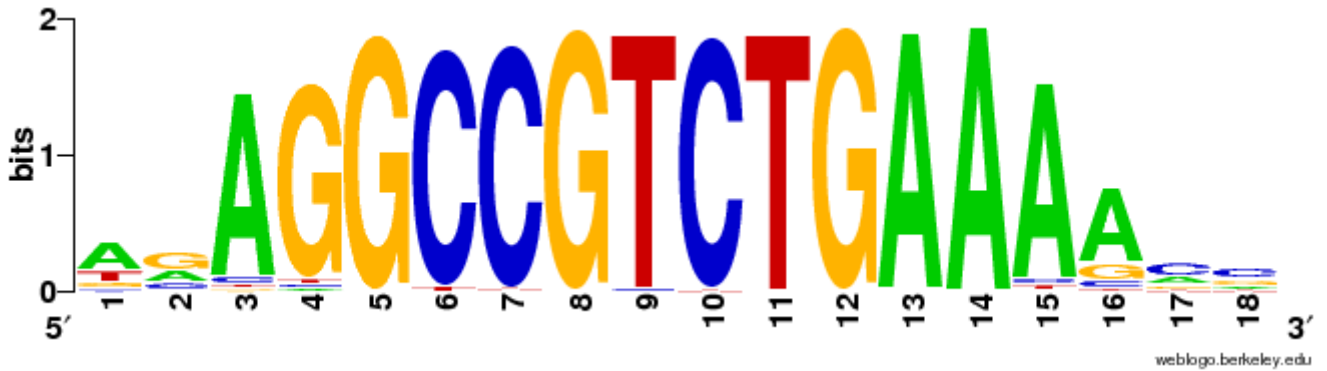

*Neisseria flavescens* SK114 (AG-DUS)

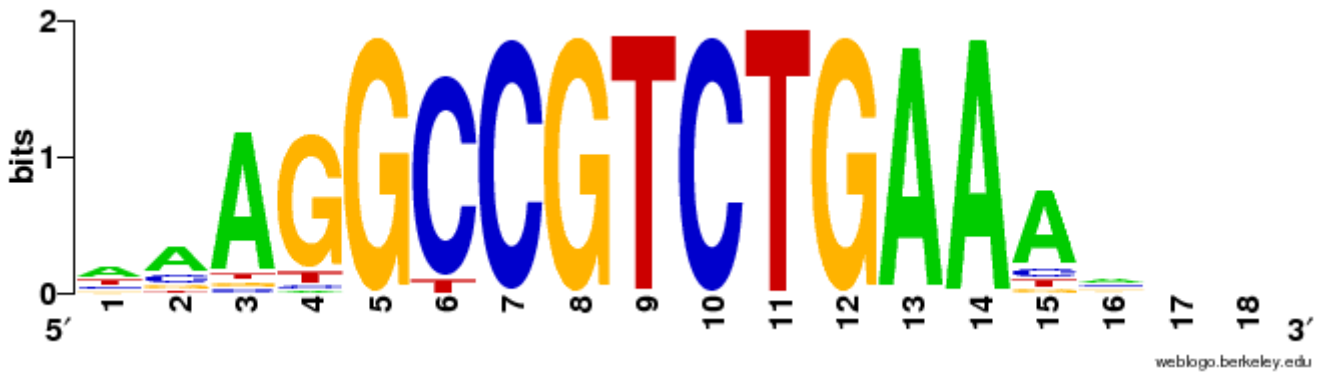

*Neisseria mucosa* C102 (AG-DUS)

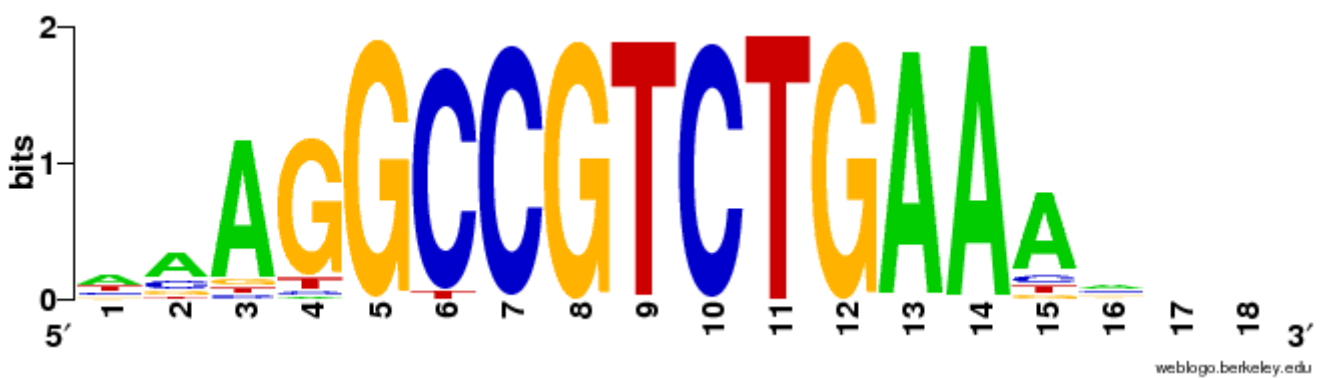

Figure S1: Sequence logos, single divergence permitted

C

*Neisseria elongata* subsp. *glycolytica* ATCC 29315 (AG-DUS)

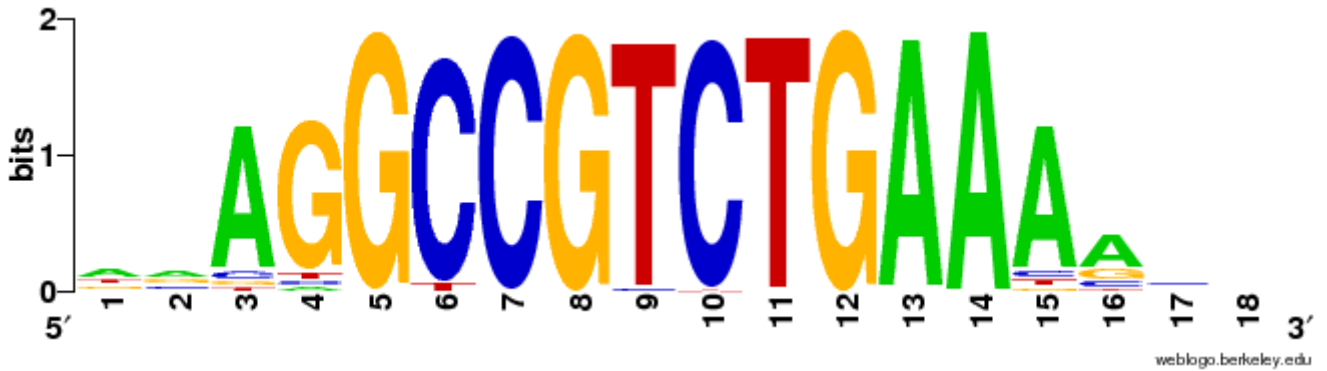

*Neisseria* sp. oral taxon 014 str.F0314 (AG-DUS)

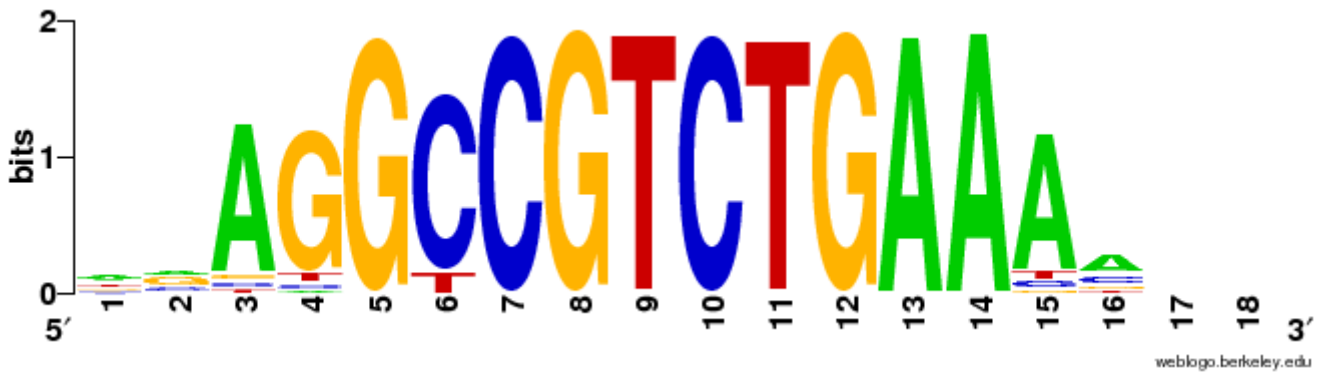

*Neisseria mucosa* ATCC 25996 (AG-mucDUS)

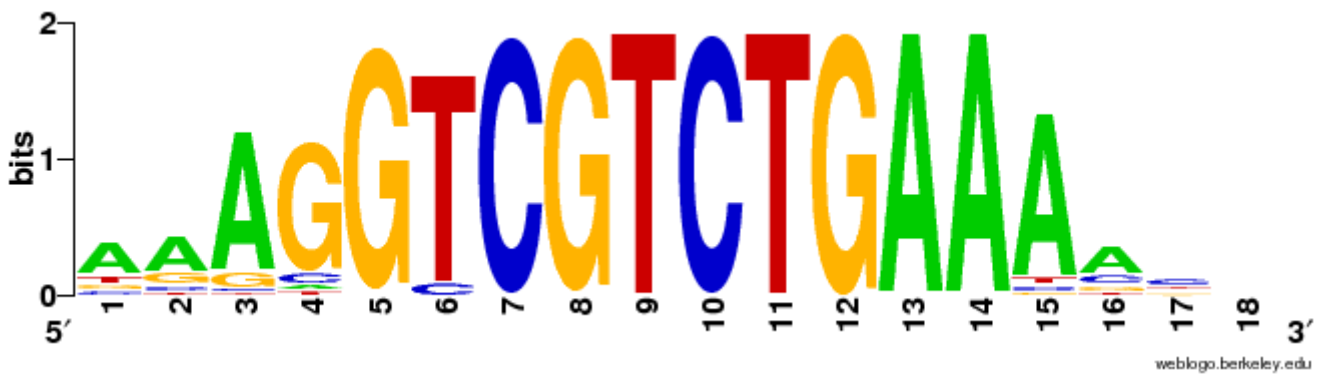

Figure S1: Sequence logos, single divergence permitted

D

*Eikenella corrodens* ATCC 23834 (AG-eikDUS)

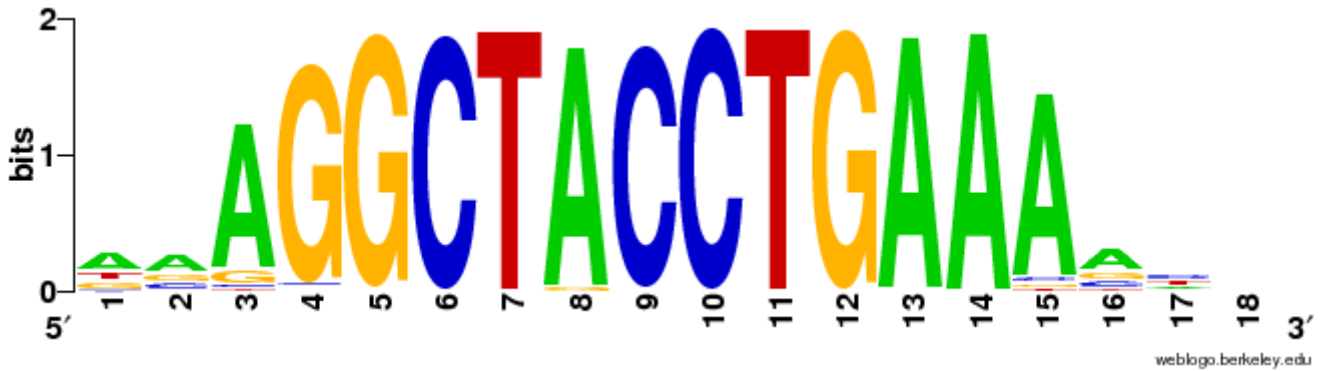

*Kingella oralis* ATCC 51147 (AG-kingDUS)

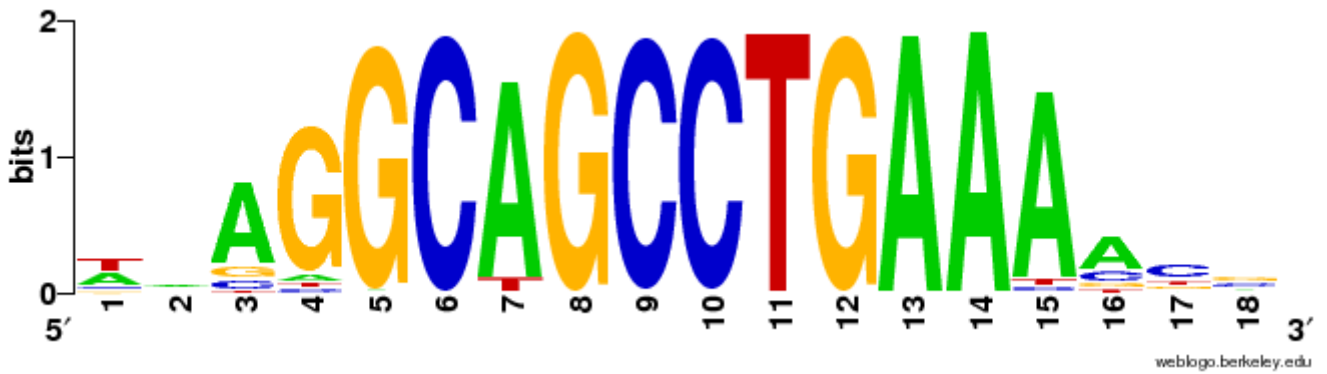

*Kingella denitrificans* ATCC 33394 (AA-king3DUS)

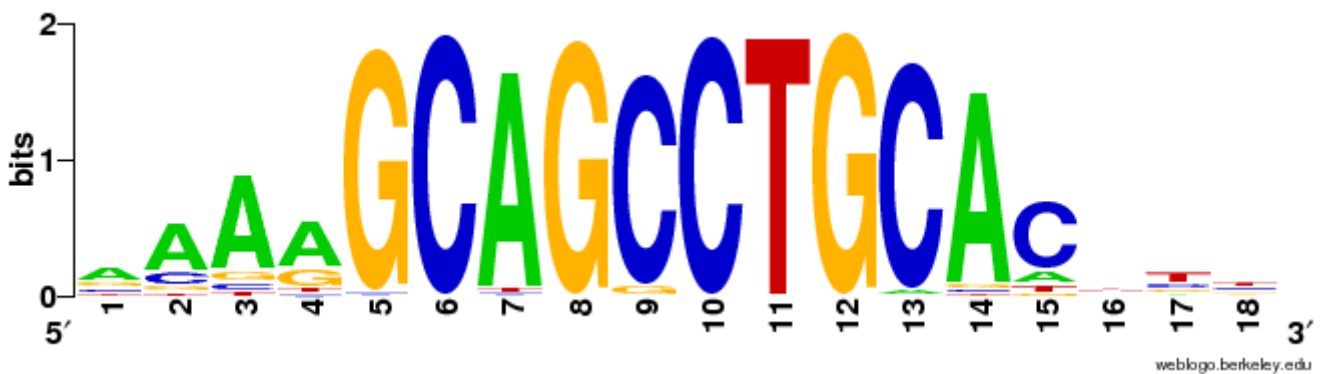

Figure S1: Sequence logos, single divergence permitted

*Simonsiella muelleri* ATCC 29453

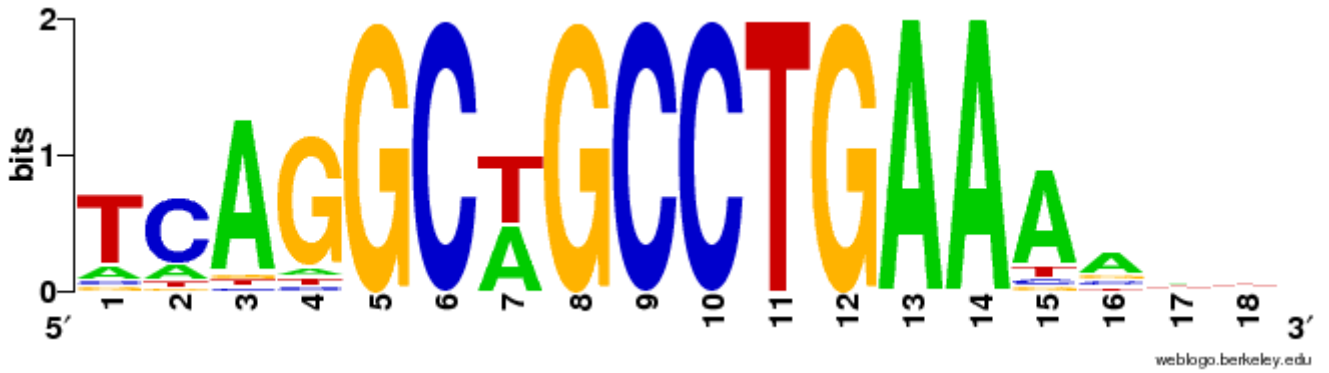

(AG-kingDUS)

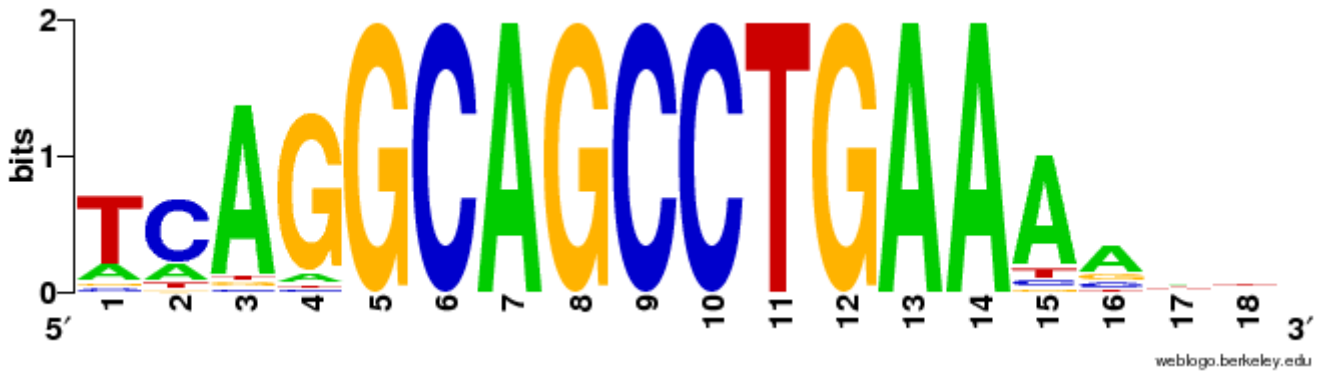

(AG-simDUS)

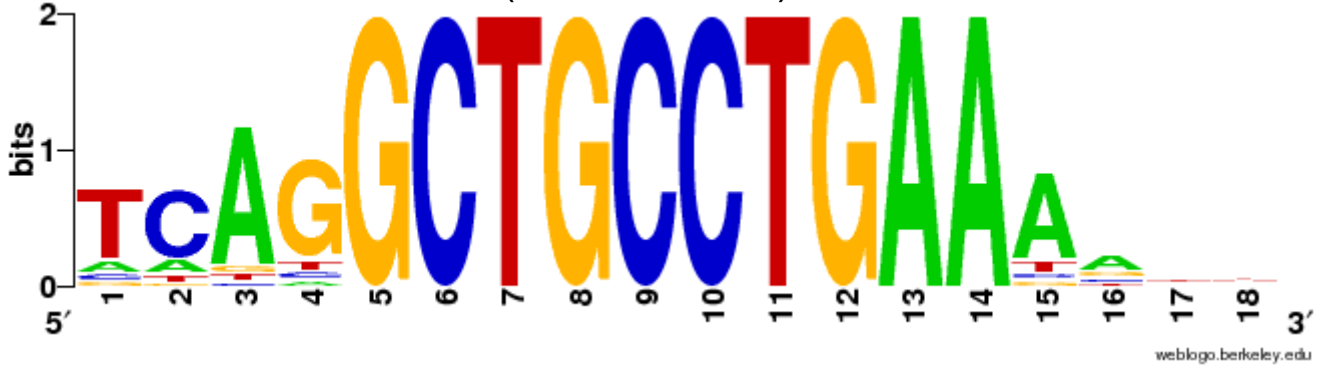

*Simonsiella muelleri* ATCC 29453

(positions -7 to +17)

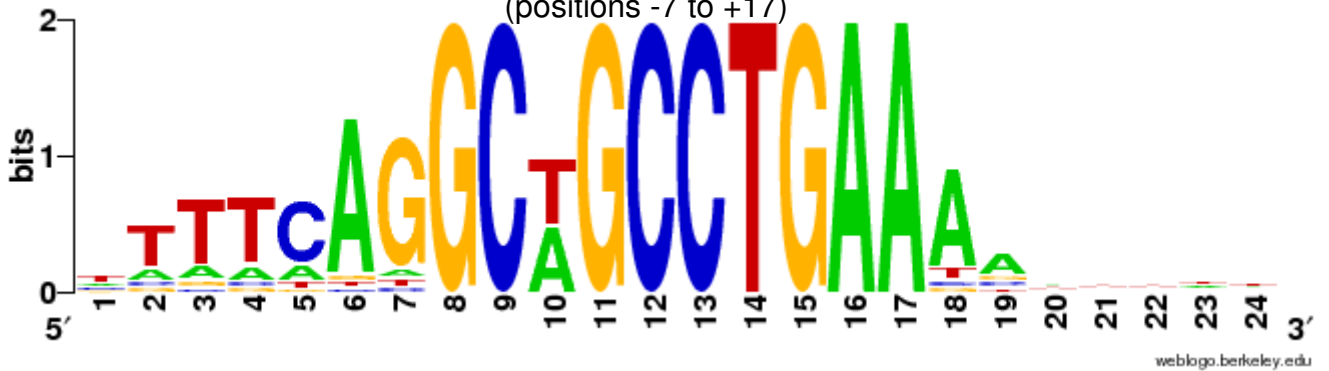

Figure S1: Sequence logos, no divergence permitted
