# Supplementary material for: Dialects of the DNA Uptake Sequence in Neisseriaceae
Source: PubMed Central journal article supplement (PMC3630211; doi:10.1371/journal.pgen.1003458), 2013-04-18
Supplement: pgen.1003458.s004.pdf [file pgen.1003458.s004.pdf]

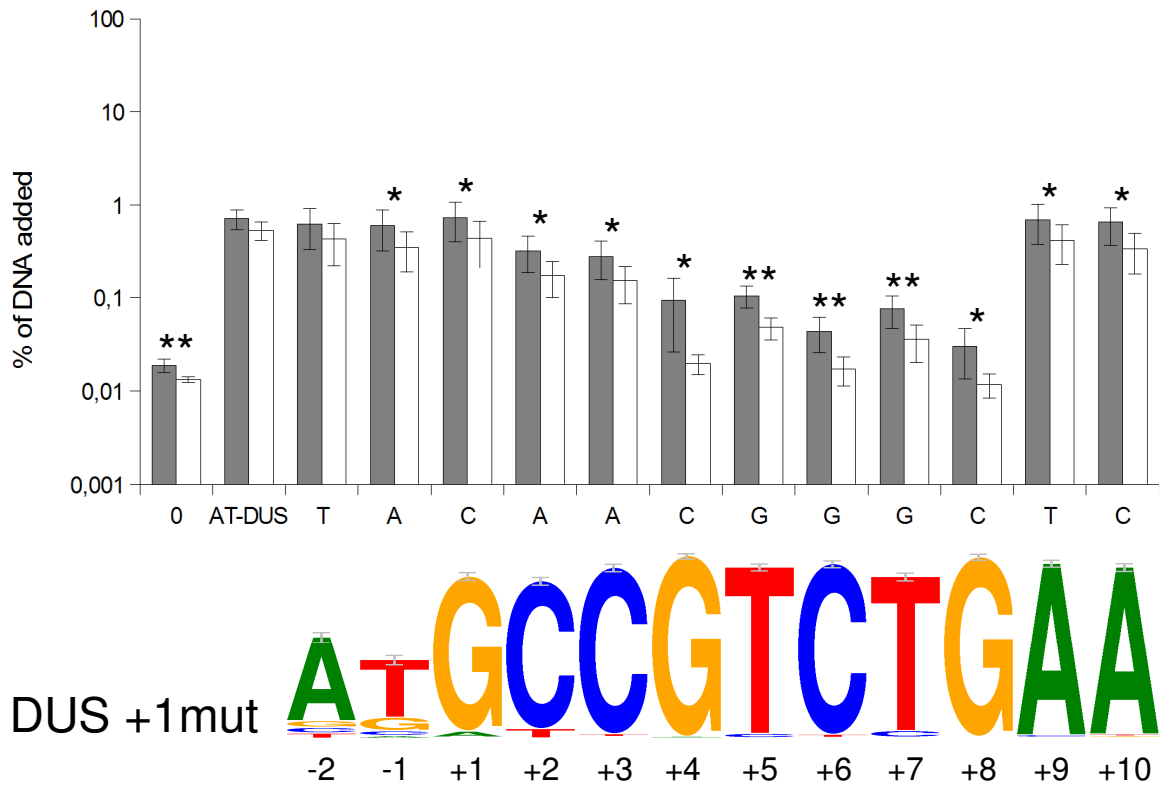

Figure S4: *Neisseria meningitidis* 8013 DNA binding and uptake
