# Supplementary material for: Dialects of the DNA Uptake Sequence in Neisseriaceae
Source: PubMed Central journal article supplement (PMC3630211; doi:10.1371/journal.pgen.1003458), 2013-04-18
Supplement: pgen.1003458.s006.pdf [file pgen.1003458.s006.pdf]

**A**

Q A A \*  
 S G S L  
 F R Q P E  
 TTCAGGCAGCCTGAA AG-kingDUS  
 simDUS (reverse) AAGTCCGTCGGA CTT

Q A A \*  
 S G C L  
 F R L P E  
 TTCAGGCTGCCTGAA AG-simDUS  
 AG-kingDUS (reverse) AAGTCCGACGGACTT

|                                           |        |
|-------------------------------------------|--------|
| <i>Simonsiella muelleri</i> ATCC 29453:   | n=1294 |
| <i>Kingella oralis</i> ATCC 51147:        | n= 318 |
| <i>Kingella kingae</i> ATCC 23330:        | n= 161 |
| <i>Kingella denitrificans</i> ATCC 33394: | n= 30  |
| <i>Eikenella corrodens</i> ATCC 23834:    | n= 5   |
| <i>Neisseria meningitidis</i> MC58:       | n= 7   |

**B**

Q A A  
 A G C  
 C R L  
 TGCAGGCTGCT T-king2DUS  
 A-king3DUS (reverse) ACGTCCGACGA

Q P A  
 A A C  
 S S L  
 AGCAGCCTGCA A-king3DUS  
 T-king2DUS (reverse) TCGTCGGACGT

|                                           |        |
|-------------------------------------------|--------|
| <i>Kingella denitrificans</i> ATCC 33394: | n=1405 |
| <i>Kingella kingae</i> ATCC 23330:        | n=1217 |
| <i>Eikenella corrodens</i> ATCC 23834:    | n= 44  |
| <i>Kingella oralis</i> ATCC 51147:        | n= 8   |
| <i>Neisseria meningitidis</i> MC58:       | n= 8   |
| <i>Simonsiella muelleri</i> ATCC 29453:   | n= 5   |

Figure S6: Dyad symmetry structures based on DUS sequences, marked with black background; kingDUS and simDUS (A); king3DUS and king2DUS (B). In the translations of the three reading frames variable positions are shown with a gray background. The number of occurrences of this structures in selected genomes are given. The king2DUS was not considered a separate DUS dialect as there are only 77 king2DUS in the genome of *K. denitrificans* that are not occurring together with king3DUS.
