# Supplementary material for: Dialects of the DNA Uptake Sequence in Neisseriaceae
Source: PubMed Central journal article supplement (PMC3630211; doi:10.1371/journal.pgen.1003458), 2013-04-18
Supplement: pgen.1003458.s007.pdf [file pgen.1003458.s007.pdf]

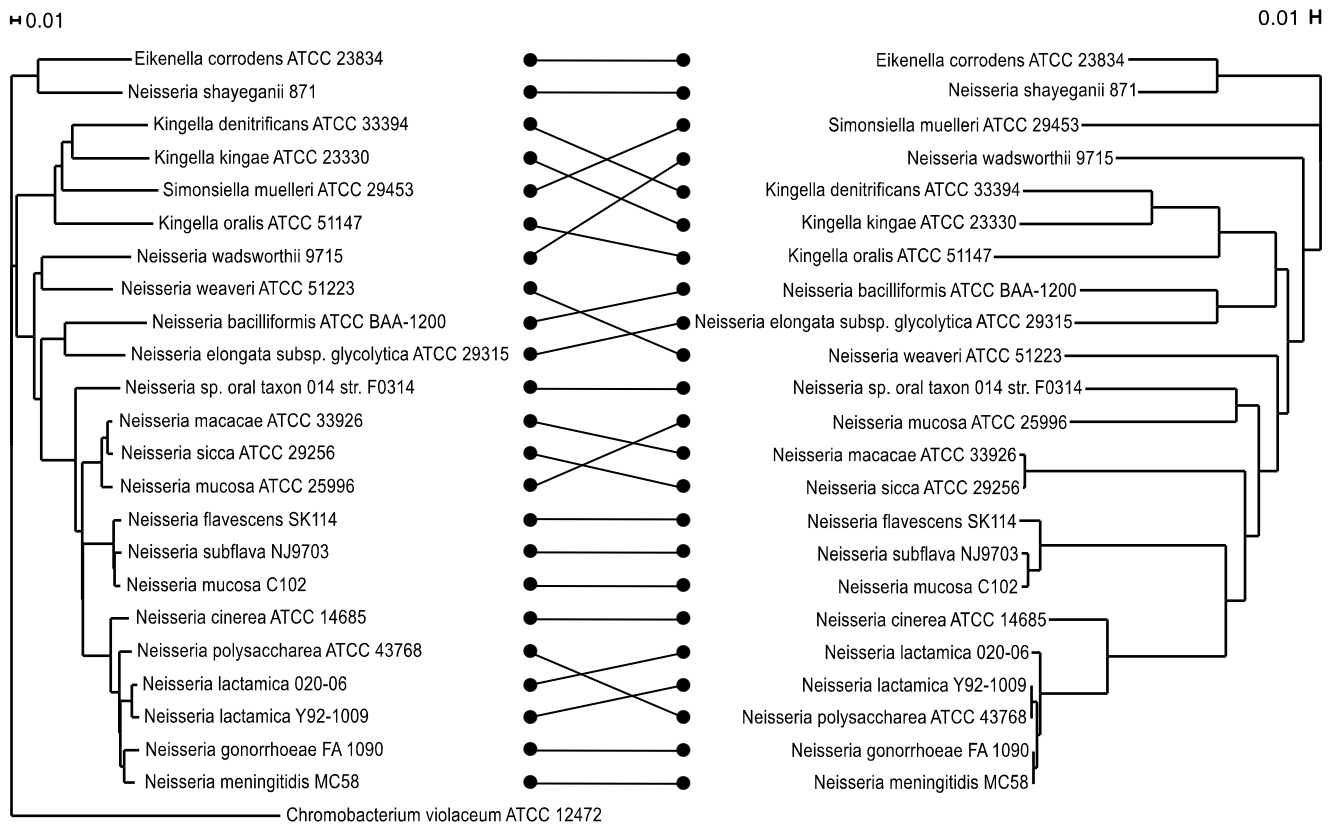

Figure S7: Comparison of the core genome based and the ComP based phylogeny
