# Supplementary material for: Dialects of the DNA Uptake Sequence in Neisseriaceae
Source: PubMed Central journal article supplement (PMC3630211; doi:10.1371/journal.pgen.1003458), 2013-04-18
Supplement: pgen.1003458.s008.pdf [file pgen.1003458.s008.pdf]

**Table S1: Number of over-represented sequences in *Neisseriaceae***

**A) Canonical DUS**

| strain                                | DUS  | DUS +1mut <sup>1</sup> | mucDUS |
|---------------------------------------|------|------------------------|--------|
| <b><i>Neisseria</i> (with AT-DUS)</b> |      |                        |        |
| <b><i>Neisseria meningitidis</i></b>  |      |                        |        |
| 053442                                | 1858 | 2678                   | 151    |
| 8013                                  | 1915 | 2729                   | 148    |
| 961-5945                              | 1926 | 2728                   | 180    |
| ATCC 13091                            | 1925 | 2717                   | 157    |
| CU385                                 | 1921 | 2726                   | 170    |
| ES14902                               | 1882 | 2696                   | 161    |
| FAM18                                 | 1888 | 2704                   | 166    |
| G2136                                 | 1889 | 2702                   | 168    |
| H44/76                                | 1911 | 2713                   | 160    |
| M01-240149                            | 1935 | 2706                   | 149    |
| M01-240355                            | 1906 | 2758                   | 171    |
| M04-240196                            | 1928 | 2738                   | 169    |
| M0579                                 | 1958 | 2743                   | 150    |
| M13399                                | 1928 | 2732                   | 163    |
| M6190                                 | 1892 | 2706                   | 160    |
| MC58                                  | 1935 | 2742                   | 165    |
| N1568                                 | 1913 | 2743                   | 157    |
| NZ-05/33                              | 1947 | 2721                   | 149    |
| OX99.30304                            | 1843 | 2600                   | 155    |
| WUE2594                               | 1933 | 2769                   | 166    |
| Z2491                                 | 1892 | 2705                   | 168    |
| α14                                   | 1851 | 2701                   | 180    |
| α153                                  | 1831 | 2599                   | 153    |
| α275                                  | 1862 | 2672                   | 160    |
| α710                                  | 1939 | 2714                   | 150    |
| <b><i>Neisseria gonorrhoeae</i></b>   |      |                        |        |
| 1291                                  | 1897 | 2652                   | 103    |
| 35/02                                 | 1917 | 2668                   | 116    |
| DGI18                                 | 1920 | 2656                   | 107    |
| DGI2                                  | 1928 | 2672                   | 109    |
| F19                                   | 1932 | 2690                   | 109    |
| F6140                                 | 1919 | 2668                   | 110    |
| F62                                   | 1967 | 2739                   | 118    |
| FA1090                                | 1965 | 2734                   | 118    |
| MS11                                  | 1919 | 2685                   | 108    |
| NCCP11945                             | 1966 | 2766                   | 129    |
| PID1                                  | 1927 | 2688                   | 115    |

<sup>1</sup> DUS+1mut = number of DUS plus the number of DUS sequences with one mutation

| strain                              | DUS  | DUS +1mut <sup>1</sup> | mucDUS |
|-------------------------------------|------|------------------------|--------|
| <b>Neisseria (with AT-DUS)</b>      |      |                        |        |
| PID18                               | 1918 | 2683                   | 111    |
| PID24-1                             | 1922 | 2662                   | 107    |
| PID332                              | 1940 | 2701                   | 111    |
| SK-92-1035                          | 1913 | 2644                   | 107    |
| SK-92-679                           | 1912 | 2671                   | 109    |
| <b>Neisseria lactamica</b>          |      |                        |        |
| ATCC 23970                          | 2213 | 2820                   | 111    |
| NS19                                | 2102 | 2708                   | 121    |
| ST640                               | 2245 | 2807                   | 91     |
| Y92-1009                            | 2113 | 2620                   | 82     |
| <b>Neisseria cinerea</b>            |      |                        |        |
| ATCC 14685                          | 943  | 1372                   | 113    |
| <b>Neisseria polysaccharea</b>      |      |                        |        |
| ATCC 43768                          | 2183 | 2831                   | 138    |
| <b>Neisseria (with AG-DUS)</b>      |      |                        |        |
| <i>Neisseria</i> sp. oral taxon 014 |      |                        |        |
| str. F0314                          | 3236 | 4069                   | 467    |
| <b>Neisseria subflava</b>           |      |                        |        |
| NJ9703                              | 2871 | 3511                   | 166    |
| <b>Neisseria flavescens</b>         |      |                        |        |
| NRL30031 H210                       | 1196 | 1585                   | 86     |
| SK114                               | 2767 | 3413                   | 247    |
| <b>Neisseria mucosa</b>             |      |                        |        |
| C102                                | 2964 | 3466                   | 155    |
| <b>Neisseria bacilliformis</b>      |      |                        |        |
| ATCC BAA-1200                       | 4265 | 4914                   | 140    |
| <b>Neisseria weaveri</b>            |      |                        |        |
| ATCC 51223                          | 2842 | 3355                   | 15     |
| LMG 5135                            | 2875 | 3415                   | 15     |
| <b>Neisseria elongata</b>           |      |                        |        |
| subsp. glycolytica ATCC 29315       | 3273 | 3885                   | 174    |

## B) mucDUS

| strain                   | DUS | DUS +1mut | mucDUS | mucDUS +1mut |
|--------------------------|-----|-----------|--------|--------------|
| <b>Neisseria mucosa</b>  |     |           |        |              |
| ATCC 25996               | 179 | 1988      | 1543   | 1934         |
| <b>Neisseria sicca</b>   |     |           |        |              |
| NRL 30,016               | 298 | 4452      | 3770   | 4378         |
| DS1                      | 229 | 3798      | 3212   | 3827         |
| 4320                     | 212 | 3852      | 3294   | 3893         |
| <b>Neisseria macacae</b> |     |           |        |              |
| ATCC 33926               | 300 | 4362      | 3729   | 4299         |
| <b>Neisseria sp.</b>     |     |           |        |              |
| Neisseria sp. GT4A CT1   | 270 | 4286      | 3670   | 4227         |

### C) Other DUS

| strain                        | DUS                              | DUS<br>+1mut |          |                   |
|-------------------------------|----------------------------------|--------------|----------|-------------------|
| <i>Neisseria wadsworthii</i>  |                                  |              | wadDUS   | wadDUS<br>+1mut   |
| 9715                          | 381                              | 679          | 2426     | 2833              |
| <i>Kingella oralis</i>        |                                  |              | kingDUS  | kingDUS<br>+1mut  |
| ATCC 51147                    | 76                               | 320          | 5918     | 7153              |
| <i>Simonsiella muelleri</i>   |                                  |              | kingDUS  | kingDUS<br>+1mut  |
| ATCC 29453                    | 14                               | 204          | 2257     | 5345              |
|                               |                                  |              | simDUS   | simDUS<br>+1mut   |
|                               |                                  |              | 2292     | 5342              |
| <i>Kingella kingae</i>        |                                  |              | king3DUS | king3DUS<br>+1mut |
| ATCC 23330                    | 12                               | 142          | 2787     | 3678              |
| 269-492                       | no counts available <sup>†</sup> |              |          |                   |
| <i>Kingella denitrificans</i> |                                  |              | king3DUS | king3DUS<br>+1mut |
| ATCC 33394                    | 79                               | 371          | 3603     | 4982              |
| <i>Eikenella corrodens</i>    |                                  |              | eikDUS   | eikDUS<br>+1mut   |
| ATCC 23834                    | 112                              | 326          | 3269     | 3706              |
| <i>Neisseria shayeganii</i>   |                                  |              | eikDUS   | eikDUS<br>+1mut   |
| 871                           | 82                               | 301          | 2245     | 2568              |

<sup>†</sup> = king3DUS was found in *K. kingae* strain 269-492 based on the analysis of the following sequences obtained from GenBank: gi209864116, gi209864114; gi193734239, gi193734232, gi193734228, gi117956037, gi193734244, gi193734236, gi193734229. A total of 32 king3DUS were found in 47kb of sequence.

**D) Over-represented 10-mer sequences in the genomes of other *Neisseriaceae***

| <b>strain</b>                           | <b>sequence</b>           | <b>counts</b>     |
|-----------------------------------------|---------------------------|-------------------|
| <b><i>Laribacter hongkongensis</i></b>  |                           |                   |
| HLHK9                                   | GCCGGCCAGC <sup>1</sup>   | 485               |
|                                         | CATGAAAAAA <sup>2</sup>   | 48                |
| <b><i>Lutiella nitroferrum</i></b>      |                           |                   |
| 2002                                    | GTTGGCCGAA <sup>1,2</sup> | 1104              |
| <b><i>Pseudogulbenkiania</i></b>        |                           |                   |
| sp. NH8B                                | GTTGGCCGAA <sup>1,2</sup> | 1153              |
| <b><i>Chromobacterium</i></b>           |                           |                   |
| sp. C-61                                | CGCCGCCGGC <sup>1</sup>   | 2242 <sup>3</sup> |
|                                         | AGATCGTAAA <sup>2</sup>   | 352 <sup>3</sup>  |
| <b><i>Chromobacterium violaceum</i></b> |                           |                   |
| ATCC 12472                              | CAGCAGCAGC <sup>1</sup>   | 714               |
|                                         | AATAAAAAAA <sup>2</sup>   | 23                |

<sup>1</sup> = highest number of counts

<sup>2</sup> = most over-represented sequence

<sup>3</sup> = based on the cumulated 1119 contigs
