# Supplementary material for: Dialects of the DNA Uptake Sequence in Neisseriaceae
Source: PubMed Central journal article supplement (PMC3630211; doi:10.1371/journal.pgen.1003458), 2013-04-18
Supplement: pgen.1003458.s009.pdf [file pgen.1003458.s009.pdf]

**Table S2: inverted DUS repeats in *Neisseriaceae***

| bacterium                                                         | fuzznuc <sup>1</sup> search pattern | counts | counts (2 mut <sup>1</sup> ) |
|-------------------------------------------------------------------|-------------------------------------|--------|------------------------------|
| <i>Eikenella corrodens</i> ATCC 23834                             | GCTACCTGAA-N(1,19)-TTCAGGTAGC       | 431    | 529                          |
| <i>Kingella denitrificans</i> ATCC 33394                          | GCAGCCTGCA-N(1,19)-TGCAGGCTGC       | 401    | 554                          |
| <i>Kingella oralis</i> ATCC 51147                                 | GCAGCCTGAA-N(1,19)-TTCAGGCTGC       | 550    | 686                          |
| <i>Neisseria wadsworthii</i> 9715                                 | CCTGTCTGAA-N(1,19)-TTCAGACAGG       | 582    | 683                          |
| <i>Neisseria elongata</i> subsp.<br><i>glycolytica</i> ATCC 29315 | GCCGTCTGAA-N(1,19)-TTCAGACGGC       | 487    | 598                          |
| <i>Neisseria mucosa</i> ATCC 25996                                | GTCGTCTGAA-N(1,19)-TTCAGACGAC       | 674    | 776                          |
| <i>Neisseria flavescens</i> SK114                                 | GCCGTCTGAA-N(1,19)-TTCAGACGGC       | 556    | 675                          |
| <i>Neisseria meningitidis</i> MC58                                | GCCGTCTGAA-N(1,19)-TTCAGACGGC       | 380    | 555                          |

<sup>1</sup> = part of the EMBOSS package [1]

<sup>2</sup> = two mutations in the search pattern allowed

**Reference:**

1. Rice P, Longden I, Bleasby A (2000) EMBOSS: the European Molecular Biology Open Software Suite. Trends Genet 16: 276-277.
