# Supplementary material for: Dialects of the DNA Uptake Sequence in Neisseriaceae
Source: PubMed Central journal article supplement (PMC3630211; doi:10.1371/journal.pgen.1003458), 2013-04-18
Supplement: pgen.1003458.s010.pdf [file pgen.1003458.s010.pdf]

**Table S3: DUS variation oligonucleotides**

| primer name               | RS <sup>1</sup> | sequence 3'→5' <sup>2</sup>                         |
|---------------------------|-----------------|-----------------------------------------------------|
| OH3                       | <i>Sac</i> I    | TAGACCGCGGTCAGGCGACCACGTTGCC                        |
| OH11_DUS                  | <i>Xho</i> I    | ACGACTCGAGAT <b>GCCGTCTGAAAT</b> GGCTAAAAACGGAGGAT  |
| 9636OHA11_DUS_B           | <i>Xho</i> I    | ACGACTCGAGTT <b>GCCGTCTGAAAT</b> GGCTAAAAACGGAGGAT  |
| 9637OHA11_DUS_C           | <i>Xho</i> I    | ACGACTCGAGA <b>AAGCCGTCTGAAAT</b> GGCTAAAAACGGAGGAT |
| 9638OHA11_DUS_D           | <i>Xho</i> I    | ACGACTCGAGAT <b>CCCGTCTGAAAT</b> GGCTAAAAACGGAGGAT  |
| 9639OHA11_DUS_E           | <i>Xho</i> I    | ACGACTCGAGAT <b>GACGTCTGAAAT</b> GGCTAAAAACGGAGGAT  |
| 9640OHA11_DUS_F           | <i>Xho</i> I    | ACGACTCGAGAT <b>GCAGTCTGAAAT</b> GGCTAAAAACGGAGGAT  |
| 9641OHA11_DUS_G           | <i>Xho</i> I    | ACGACTCGAGAT <b>GCCCTCTGAAAT</b> GGCTAAAAACGGAGGAT  |
| 9642OHA11_DUS_H           | <i>Xho</i> I    | ACGACTCGAGAT <b>GCCGGCTGAAAT</b> GGCTAAAAACGGAGGAT  |
| 9643OHA11_DUS_I           | <i>Xho</i> I    | ACGACTCGAGAT <b>GCCGTGTGAAAT</b> GGCTAAAAACGGAGGAT  |
| 9644OHA11_DUS_J           | <i>Xho</i> I    | ACGACTCGAGAT <b>GCCGTCTGAAAT</b> GGCTAAAAACGGAGGAT  |
| 9645OHA11_DUS_K           | <i>Xho</i> I    | ACGACTCGAGAT <b>GCCGTCTCAAAT</b> GGCTAAAAACGGAGGAT  |
| 9646OHA11_DUS_L           | <i>Xho</i> I    | ACGACTCGAGAT <b>GCCGTCTGTAAT</b> GGCTAAAAACGGAGGAT  |
| 9647OHA11_DUS_M           | <i>Xho</i> I    | ACGACTCGAGAT <b>GCCGTCTGACAT</b> GGCTAAAAACGGAGGAT  |
| 9648OHA11_DUS_N           | <i>Xho</i> I    | ACGACTCGAGAG <b>GCCGTCTGAAAT</b> GGCTAAAAACGGAGGAT  |
| 9649OHA11_DUS_O (mucDUS)  | <i>Xho</i> I    | ACGACTCGAGAG <b>GTCTGCTGAAAT</b> GGCTAAAAACGGAGGAT  |
| 9650OHA11_DUS_P (kingDUS) | <i>Xho</i> I    | ACGACTCGAGAG <b>GCAGCCTGAAAT</b> GGCTAAAAACGGAGGAT  |
| 9651OHA11_DUS_Q (eikDUS)  | <i>Xho</i> I    | ACGACTCGAGAG <b>GCTACCTGAAAT</b> GGCTAAAAACGGAGGAT  |
| OHA2025_USS_Hinfrev       | <i>Xho</i> I    | ACGACTCGAGT <b>GCCGTGAAAT</b> GGCTAAAAACGGAGGAT     |
| OHA2024_USS_Hinf          | <i>Xho</i> I    | ACGACTCGAGAA <b>AGTGCGGT</b> GGCTAAAAACGGAGGAT      |

<sup>1</sup> = restriction site

<sup>2</sup> = DUS and mutated DUS sequences in bold
