# Supplementary material for: Dialects of the DNA Uptake Sequence in Neisseriaceae
Source: PubMed Central journal article supplement (PMC3630211; doi:10.1371/journal.pgen.1003458), 2013-04-18
Supplement: pgen.1003458.s011.pdf [file pgen.1003458.s011.pdf]

**Table S4: Bacteria and plasmids**

| name                                                                                                         | relevant characteristics                                                                                                                                                                                                                           | reference           |
|--------------------------------------------------------------------------------------------------------------|----------------------------------------------------------------------------------------------------------------------------------------------------------------------------------------------------------------------------------------------------|---------------------|
| <i>Escherichia coli</i> ER2566                                                                               | F <sup>-</sup> λ- <i>fhuA2</i> [ <i>lon</i> ] <i>ompT lacZ</i> ::T7 gene1 <i>gal sulA11</i> Δ( <i>mcrC-mrr</i> )114::IS10 R( <i>mcr-73</i> ::miniTn10-Tet <sup>S</sup> )2 R( <i>zgb-210</i> ::Tn10)(Tet <sup>S</sup> ) <i>endA1</i> [ <i>dcm</i> ] | New England Biolabs |
| <i>Escherichia coli</i> XL-1 Blue                                                                            | <i>recA1 endA1 gyrA96 thi-1 hsdR17 supE44 relA1 lac</i> [F' <i>proAB lacI</i> <sup>f</sup> Δ <i>M15 Tn10 (Tet<sup>r</sup>)</i> ]                                                                                                                   | Stratagene          |
| <i>Neisseria meningitidis</i> strain MC58                                                                    | serogroup B                                                                                                                                                                                                                                        | [1]                 |
| <i>Neisseria meningitidis</i> strain 8013                                                                    | serogroup C                                                                                                                                                                                                                                        | [2]                 |
| <i>Neisseria elongata</i><br>subsp. <i>glycolytica</i> 6171/75<br>(= ATCC 29315 = NCTC 11050<br>= DSM 23337) | type strain                                                                                                                                                                                                                                        | [3]                 |
| <i>Neisseria mucosa</i><br>(= ATCC 19696 = NCTC 12978<br>= DSM 17611)                                        | type strain                                                                                                                                                                                                                                        | [4]                 |
| <i>Neisseria mucosa</i><br>(= ATCC 25996 = NCTC 10774<br>= DSM 4631)                                         | isolated from human pharyngeal mucosa                                                                                                                                                                                                              | [5,6]               |
| <i>Neisseria sicca</i> NRL 30,016<br>(= ATCC 29259 = DSM 17713)                                              | type strain                                                                                                                                                                                                                                        | [7]                 |
| <i>Kingella oralis</i><br>(ATCC 51147 = DSM 18271)                                                           | type strain                                                                                                                                                                                                                                        | [8]                 |
| <i>Kingella denitrificans</i><br>(= ATCC 33394 = NCTC 10995<br>= DSM 10202)                                  | type strain                                                                                                                                                                                                                                        | [9]                 |
| <i>Eikenella corrodens</i> strain 31745                                                                      | isolated from spinal fluid                                                                                                                                                                                                                         | [10]                |
| <i>Eikenella corrodens</i><br>(ATCC 23834 = NCTC 10596<br>= DSM 8340)                                        | type strain                                                                                                                                                                                                                                        | [11]                |
| p0-DUS                                                                                                       | pBluescript II SK+<br>harbouring <i>pilG</i> ::mTnErm                                                                                                                                                                                              | [12]                |
| pOHA-D4                                                                                                      | AT - DUS                                                                                                                                                                                                                                           | this study          |
| pSAF-DV-36                                                                                                   | TT - DUS                                                                                                                                                                                                                                           | this study          |
| pOHA-DV-37                                                                                                   | AA - DUS                                                                                                                                                                                                                                           | this study          |
| pSAF-DV-38                                                                                                   | AT - CCCGTCTGAA                                                                                                                                                                                                                                    | this study          |
| pSAF-DV-39                                                                                                   | AT - GACGTCTGAA                                                                                                                                                                                                                                    | this study          |
| pSAF-DV-40                                                                                                   | AT - GCAGTCTGAA                                                                                                                                                                                                                                    | this study          |
| pSAF-DV-41                                                                                                   | AT - GCCCTCTGAA                                                                                                                                                                                                                                    | this study          |
| pSAF-DV-42                                                                                                   | AT - GCCCGCTGAA                                                                                                                                                                                                                                    | this study          |
| pOHA-DV-43                                                                                                   | AT - GCCGTGTGAA                                                                                                                                                                                                                                    | this study          |
| pSAF-DV-44                                                                                                   | AT - GCCGTCTGGAA                                                                                                                                                                                                                                   | this study          |
| pSAF-DV-45                                                                                                   | AT - GCCGTCTCAA                                                                                                                                                                                                                                    | this study          |
| pSAF-DV-46                                                                                                   | AT - GCCGTCTGTA                                                                                                                                                                                                                                    | this study          |
| pOHA-DV-47                                                                                                   | AT - GCCGTCTGAC                                                                                                                                                                                                                                    | this study          |
| pSAF-DV-48                                                                                                   | AG - DUS                                                                                                                                                                                                                                           | this study          |
| pSAF-DV-49                                                                                                   | AG - mucDUS                                                                                                                                                                                                                                        | this study          |
| pSAF-DV-50                                                                                                   | AG - kingDUS                                                                                                                                                                                                                                       | this study          |
| pSAF-DV-51                                                                                                   | AG - eikDUS                                                                                                                                                                                                                                        | this study          |
| pSAF-DV-52                                                                                                   | reverse USS                                                                                                                                                                                                                                        | this study          |
| pSAF-DV-53                                                                                                   | USS                                                                                                                                                                                                                                                | this study          |

## References

1. Tettelin H, Saunders NJ, Heidelberg J, Jeffries AC, Nelson KE, et al. (2000) Complete genome sequence of *Neisseria meningitidis* serogroup B strain MC58. *Science* 287: 1809-1815.
2. Nassif X, Lowy J, Stenberg P, O'Gaora P, Ganji A, et al. (1993) Antigenic variation of pilin regulates adhesion of *Neisseria meningitidis* to human epithelial cells. *Mol Microbiol* 8: 719-725.
3. Henriksen SD, Holten E (1976) *Neisseria elongata* subsp. *glycolytica* subsp. nov. *International Journal of Systematic Bacteriology* October 1976: 478-481.
4. Veron M, Thibault P, Second L (1959) [*Neisseria mucosa* (*Diplococcus mucosus* Lingelsheim)]. I. Bacteriological description and study of its pathogenicity]. *Ann Inst Pasteur (Paris)* 97: 497-510.
5. Berger U (1971) [*Neisseria mucosa* var. *heidelbergensis*]. *Z Med Mikrobiol Immunol* 156: 154-158.
6. Roberts RJ (1985) Restriction and modification enzymes and their recognition sequences. *Nucleic Acids Res* 13 Suppl: r165-200.
7. Bøvre K (1984) Family VIII. *Neisseriaceae*. In: Krieg NR, Holt JG, editors. *Bergey's manual of systematic bacteriology*. Baltimore: Williams & Wilkins. pp. 288-309.
8. Dewhirst FE, Chen CK, Paster BJ, Zambon JJ (1993) Phylogeny of species in the family Neisseriaceae isolated from human dental plaque and description of *Kingella oralis* sp. nov [corrected]. *Int J Syst Bacteriol* 43: 490-499.
9. Weir S, Lee LW, Marrs CF (1996) Identification of four complete type 4 pilin genes in a single *Kingella denitrificans* genome. *Infect Immun* 64: 4993-4999.
10. Tønjum T, Hagen N, Bøvre K (1985) Identification of *Eikenella corrodens* and *Cardiobacterium hominis* by genetic transformation. *Acta Pathol Microbiol Immunol Scand B* 93: 389-394.
11. Henriksen SD (1969) Corroding bacteria from the respiratory tract. 2. *Bacteroides corrodens*. *Acta Pathol Microbiol Scand* 75: 91-96.
12. Ambur OH, Frye SA, Tønjum T (2007) New functional identity for the DNA uptake sequence in transformation and its presence in transcriptional terminators. *J Bacteriol* 189: 2077-2085.
