# Supplementary material for: Dialects of the DNA Uptake Sequence in Neisseriaceae
Source: PubMed Central journal article supplement (PMC3630211; doi:10.1371/journal.pgen.1003458), 2013-04-18
Supplement: pgen.1003458.s012.pdf [file pgen.1003458.s012.pdf]

**Table S5: *RpsL* specific PCR primer**

| target                                                    | primer name | orientation | DUS         | RS <sup>1</sup> | sequence 3' → 5' <sup>2</sup>                                   |
|-----------------------------------------------------------|-------------|-------------|-------------|-----------------|-----------------------------------------------------------------|
| <i>Kingella denitrificans</i>                             | OHA2235     | forward     | AA-king3DUS | <i>SacI</i>     | GTGAGCTCAAG <b>CAGCCTGC</b> ACATGCC<br>AACGATTAACCAATTGGTTTCGCA |
|                                                           | OHA2236     | forward     | AT-DUS      | <i>SacI</i>     | GTGAGCTCAT <b>GCCGTCTG</b> AAAATGCC<br>AACGATTAACCAATTGGTTTCGCA |
|                                                           | OHA2239     | reverse     | -           | <i>XhoI</i>     | GTCTCGAGTTATTTAGGGCGTTTAGC<br>ACCGTATTTAGAA                     |
| <i>Eikenella corrodens</i>                                | OHA2146     | forward     | AG-eikDUS   | <i>SacI</i>     | GTGAGCTCTTT <b>CAGGTAGCCT</b> ATGCC<br>AACTATTAACCAGTTAGTACGCA  |
|                                                           | OHA2148     | reverse     | AG-eikDUS   | <i>XhoI</i>     | GTCTCGAG <b>AGGCTACCTG</b> AAATTATT<br>TCGGGCGTTTAGCACC GTATT   |
|                                                           | OHA2147     | forward     | AT-DUS      | <i>SacI</i>     | GTGAGCTCTTT <b>CAGACGGC</b> ATATGCC<br>AACTATTAACCAGTTAGTACGCA  |
|                                                           | OHA2149     | reverse     | AT-DUS      | <i>XhoI</i>     | GTCTCGAGAT <b>GCCGTCTG</b> AAATTATT<br>TCGGGCGTTTAGCACC GTATT   |
| <i>Neisseria elongata</i><br>subsp.<br><i>glycolytica</i> | OHA2137     | forward     | AT-DUS      | <i>SacI</i>     | GTGAGCTCTT <b>CAGACGGC</b> ATATGCCA<br>ACTATCAACCAATTGGTACGCA   |
|                                                           | SF137       | reverse     | AT-DUS      | <i>XhoI</i>     | GTCTCGAGTT <b>CAGACGGC</b> ATTTATTT<br>AGGACGCTTAGCACC GTATT    |
|                                                           | SF138       | forward     | AG-DUS      | <i>SacI</i>     | GTGAGCTCTT <b>CAGACGGC</b> CATATGCCA<br>ACTATCAACCAATTGGTACGCA  |
|                                                           | SF139       | reverse     | AG-DUS      | <i>XhoI</i>     | GTCTCGAGTT <b>CAGACGGC</b> CTTTATTT<br>AGGACGCTTAGCACC GTATT    |
|                                                           | OHA2136     | forward     | AG-mucDUS   | <i>SacI</i>     | GTGAGCTCTT <b>CAGACGAC</b> CATATGCCA<br>ACTATCAACCAATTGGTACGCA  |
|                                                           | SF140       | reverse     | AG-mucDUS   | <i>XhoI</i>     | GTCTCGAGTT <b>CAGACGAC</b> CTTTATTT<br>AGGACGCTTAGCACC GTATT    |

<sup>1</sup> = restriction site

<sup>2</sup> = DUS sequences in bold
